# Supplementary material for: Ush regulates hemocyte-specific gene expression, fatty acid metabolism and cell cycle progression and cooperates with dNuRD to orchestrate hematopoiesis
Source: PubMed Central journal article supplement (PMC7891773; doi:10.1371/journal.pgen.1009318), 2021-02-18
Supplement: pgen.1009318.s009.pdf [file pgen.1009318.s009.pdf]

| Genes validated by RTqPCR | category                | annotated peak within promoter and/or gene body |           |
|---------------------------|-------------------------|-------------------------------------------------|-----------|
|                           |                         | Ush-GFP                                         | dMi-2-GFP |
| <b>CG16267</b>            | <b>hemocyte-related</b> | yes                                             | yes       |
| <b>pirk</b>               | <b>hemocyte-related</b> | yes                                             | yes       |
| <b>GILT3</b>              | <b>hemocyte-related</b> | yes                                             | no        |
| <b>Lozenge</b>            | <b>hemocyte-related</b> | yes                                             | no        |
| <b>atilla</b>             | <b>hemocyte-related</b> | no                                              | no        |
|                           |                         |                                                 |           |
| <b>AurB</b>               | <b>cell cycle</b>       | no                                              | no        |
| <b>CHES-1</b>             | <b>cell cycle</b>       | yes                                             | yes       |
| <b>CDK1</b>               | <b>cell cycle</b>       | no                                              | yes       |
| <b>polo</b>               | <b>cell cycle</b>       | no                                              | yes       |
| <b>Cyclin B</b>           | <b>cell cycle</b>       | yes                                             | yes       |
|                           |                         |                                                 |           |
| <b>Mcad</b>               | <b>lipid metabolism</b> | yes                                             | yes       |
| <b>Echs1</b>              | <b>lipid metabolism</b> | yes                                             | yes       |
| <b>ACC</b>                | <b>lipid metabolism</b> | yes                                             | yes       |
| <b>CROT</b>               | <b>lipid metabolism</b> | no                                              | no        |
| <b>fa2h</b>               | <b>lipid metabolism</b> | yes                                             | yes       |
