# Supplementary material for: Ush regulates hemocyte-specific gene expression, fatty acid metabolism and cell cycle progression and cooperates with dNuRD to orchestrate hematopoiesis
Source: PubMed Central journal article supplement (PMC7891773; doi:10.1371/journal.pgen.1009318), 2021-02-18
Supplement: pgen.1009318.s010.pdf [file pgen.1009318.s010.pdf]

| hemocyte-related | cell cycle | lipid metabolism | gene symbol    | FlyBase ID  | log <sub>2</sub> (FC dsUsh-B/dsEGFP) | FC dsUsh-B/dsEGFP | -log <sub>10</sub> (p-value) | p-value  | FlyBase GO_Biological Function / additional references                                                                                                                                                                                                                                                                                                                                                                                                                                                                                                                                                                                                  | expression pattern (BDGP)                                                                |
|------------------|------------|------------------|----------------|-------------|--------------------------------------|-------------------|------------------------------|----------|---------------------------------------------------------------------------------------------------------------------------------------------------------------------------------------------------------------------------------------------------------------------------------------------------------------------------------------------------------------------------------------------------------------------------------------------------------------------------------------------------------------------------------------------------------------------------------------------------------------------------------------------------------|------------------------------------------------------------------------------------------|
| X                | X          |                  | N              | FBgn0004647 | -0.652                               | 0.64              | 1.65                         | 2.26E-02 | regulation of crystal cell differentiation (GO:0042689); lamellocyte differentiation (GO:0035171); negative regulation of lamellocyte differentiation (GO:0035204); crystal cell differentiation (GO:0042688); larval lymph gland hemopoiesis (GO:0035167); embryonic crystal cell differentiation (GO:0035165); regulation of mitotic cell cycle (GO:0007346); positive regulation of G1/S transition of mitotic cell cycle (GO:1900087); hemocyte proliferation (GO:0035172); embryonic hemopoiesis (GO:0035162); positive regulation of cell population proliferation (GO:0008284); positive regulation of crystal cell differentiation (GO:0042691) |                                                                                          |
| X                | X          |                  | kay            | FBgn0001297 | 0.331                                | 1.26              | 1.35                         | 4.50E-02 | positive regulation of biosynthetic processes of antibacterial peptides active against Gram-negative bacteria (GO:0006964); positive regulation of peptidoglycan recognition protein signaling pathway (GO:0061059); regulation of cyclin-dependent protein serine/threonine kinase activity involved in G2/M transition of mitotic cell cycle (GO:0031660)                                                                                                                                                                                                                                                                                             | plasmatocytes A (stage 11-12)                                                            |
| X                |            | X                | Cyt-b5-r       | FBgn0000406 | 0.775                                | 1.71              | 1.75                         | 1.79E-02 | lipid metabolic process (GO:0006629)                                                                                                                                                                                                                                                                                                                                                                                                                                                                                                                                                                                                                    | procrystal cells (stage 11-12), crystal cells (stage 13-16)                              |
| X                |            |                  | Col4a1 / Cg25c | FBgn0000299 | -1.289                               | 0.41              | 6.57                         | 2.71E-07 |                                                                                                                                                                                                                                                                                                                                                                                                                                                                                                                                                                                                                                                         | plasmatocytes A (stage 11-12), plasmatocytes (stage 13-16)                               |
| X                |            |                  | vkg            | FBgn0016075 | -1.114                               | 0.46              | 4.19                         | 6.52E-05 |                                                                                                                                                                                                                                                                                                                                                                                                                                                                                                                                                                                                                                                         | plasmatocytes A (stage 11-12), plasmatocytes (stage 13-16)                               |
| X                |            |                  | CG5397         | FBgn0031327 | -1.068                               | 0.48              | 3.84                         | 1.44E-04 |                                                                                                                                                                                                                                                                                                                                                                                                                                                                                                                                                                                                                                                         | plasmatocytes (stage 13-16)                                                              |
| X                |            |                  | Spn28Dc        | FBgn0031973 | -0.876                               | 0.54              | 3.60                         | 2.48E-04 | negative regulation of melanization defense response (GO:0035009)                                                                                                                                                                                                                                                                                                                                                                                                                                                                                                                                                                                       |                                                                                          |
| X                |            |                  | Traf4          | FBgn0026319 | -0.681                               | 0.62              | 1.73                         | 1.86E-02 | defense response to Gram-negative bacterium (GO:0050829)                                                                                                                                                                                                                                                                                                                                                                                                                                                                                                                                                                                                |                                                                                          |
| X                |            |                  | CG8046         | FBgn0033388 | -0.646                               | 0.64              | 1.33                         | 4.64E-02 | positive regulation of peptidoglycan recognition protein signaling pathway (GO:0061059); positive regulation of antimicrobial humoral response (GO:0002760); peptidoglycan transport (GO:0015835)                                                                                                                                                                                                                                                                                                                                                                                                                                                       |                                                                                          |
| X                |            |                  | Tsp96F         | FBgn0027865 | -0.541                               | 0.69              | 1.79                         | 1.64E-02 |                                                                                                                                                                                                                                                                                                                                                                                                                                                                                                                                                                                                                                                         | procrystal cells (stage 11-12)                                                           |
| X                |            |                  | CD98hc         | FBgn0037533 | 0.489                                | 1.40              | 1.55                         | 2.83E-02 |                                                                                                                                                                                                                                                                                                                                                                                                                                                                                                                                                                                                                                                         | procrystal cells, plasmatocytes A (stage 11-12)                                          |
| X                |            |                  | Rac1           | FBgn0010333 | 0.520                                | 1.43              | 1.79                         | 1.64E-02 | hemocyte development (GO:0007516); immune response-regulating cell surface receptor signaling pathway involved in phagocytosis (GO:0002433); hemocyte migration (GO:0035099); melanotic encapsulation of foreign target (GO:0035011)                                                                                                                                                                                                                                                                                                                                                                                                                    |                                                                                          |
| X                |            |                  | Phk-3          | FBgn0035089 | 0.616                                | 1.53              | 1.56                         | 2.74E-02 | response to bacterium (GO:0009617)                                                                                                                                                                                                                                                                                                                                                                                                                                                                                                                                                                                                                      |                                                                                          |
| X                |            |                  | p38c           | FBgn0267339 | 0.690                                | 1.61              | 1.33                         | 4.64E-02 | response to bacterium (GO:0009617)                                                                                                                                                                                                                                                                                                                                                                                                                                                                                                                                                                                                                      |                                                                                          |
| X                |            |                  | Ugt36Bc        | FBgn0040260 | 0.742                                | 1.67              | 1.56                         | 2.74E-02 |                                                                                                                                                                                                                                                                                                                                                                                                                                                                                                                                                                                                                                                         | crystal cell SA (stage 9-10), procrystal cells (stage 11-12), crystal cell (stage 13-16) |
| X                |            |                  | GILT3          | FBgn0039098 | 0.790                                | 1.73              | 1.77                         | 1.70E-02 | Involved in the immune response to bacterial infection (Kongton et al., 2014)                                                                                                                                                                                                                                                                                                                                                                                                                                                                                                                                                                           |                                                                                          |
| X                |            |                  | Cyp310a1       | FBgn0032693 | 0.801                                | 1.74              | 2.74                         | 1.83E-03 |                                                                                                                                                                                                                                                                                                                                                                                                                                                                                                                                                                                                                                                         | plasmatocytes A (stage 11-12), plasmatocytes (stage 13-16)                               |
| X                |            |                  | pirk           | FBgn0034647 | 0.847                                | 1.80              | 2.29                         | 5.07E-03 | negative regulation of peptidoglycan recognition protein signaling pathway (GO:0061060)                                                                                                                                                                                                                                                                                                                                                                                                                                                                                                                                                                 |                                                                                          |
|                  | X          |                  | mre11          | FBgn0020270 | -0.365                               | 0.78              | 1.77                         | 1.70E-02 | mitotic G2 DNA damage checkpoint (GO:0007059); intra-S DNA damage checkpoint (GO:0031573)                                                                                                                                                                                                                                                                                                                                                                                                                                                                                                                                                               |                                                                                          |
|                  | X          |                  | 14-3-3epsilon  | FBgn0020238 | 0.451                                | 1.37              | 1.79                         | 1.62E-02 | mitotic cell cycle checkpoint (GO:0007093); regulation of mitotic nuclear division (GO:0007088)                                                                                                                                                                                                                                                                                                                                                                                                                                                                                                                                                         |                                                                                          |
|                  |            | X                | Pmp70          | FBgn0031069 | 0.539                                | 1.45              | 3.57                         | 2.72E-04 | long-chain fatty acid import into peroxisome (GO:0015910)                                                                                                                                                                                                                                                                                                                                                                                                                                                                                                                                                                                               |                                                                                          |
|                  |            |                  | CG5849         | FBgn0038897 | -0.975                               | 0.51              | 3.33                         | 4.65E-04 |                                                                                                                                                                                                                                                                                                                                                                                                                                                                                                                                                                                                                                                         |                                                                                          |
|                  |            |                  | Tsp42Ed        | FBgn0029507 | -0.889                               | 0.54              | 2.53                         | 2.97E-03 |                                                                                                                                                                                                                                                                                                                                                                                                                                                                                                                                                                                                                                                         |                                                                                          |
|                  |            |                  | lncRNA:CR44458 | FBgn0265651 | -0.879                               | 0.54              | 2.72                         | 1.90E-03 |                                                                                                                                                                                                                                                                                                                                                                                                                                                                                                                                                                                                                                                         |                                                                                          |
|                  |            |                  | kek1           | FBgn0015399 | -0.855                               | 0.55              | 3.06                         | 8.76E-04 |                                                                                                                                                                                                                                                                                                                                                                                                                                                                                                                                                                                                                                                         |                                                                                          |
|                  |            |                  | ATP8B          | FBgn0037989 | -0.854                               | 0.55              | 2.26                         | 5.55E-03 |                                                                                                                                                                                                                                                                                                                                                                                                                                                                                                                                                                                                                                                         |                                                                                          |
|                  |            |                  | CG34034        | FBgn0054034 | -0.822                               | 0.57              | 3.37                         | 4.22E-04 |                                                                                                                                                                                                                                                                                                                                                                                                                                                                                                                                                                                                                                                         |                                                                                          |
|                  |            |                  | CG8008         | FBgn0033387 | -0.729                               | 0.60              | 1.55                         | 2.83E-02 |                                                                                                                                                                                                                                                                                                                                                                                                                                                                                                                                                                                                                                                         |                                                                                          |

| hemocyte-related | cell cycle | lipid metabolism | gene symbol       | FlyBase ID  | log <sub>2</sub> (FC dsUsh-B/ dsEGFP) | FC dsUsh-B/ dsEGFP | -log <sub>10</sub> (p-value) | p-value  | FlyBase GO_Biological Function / additional references | expression pattern (BDGP) |
|------------------|------------|------------------|-------------------|-------------|---------------------------------------|--------------------|------------------------------|----------|--------------------------------------------------------|---------------------------|
|                  |            |                  | mahe              | FBgn0029979 | -0.722                                | 0.61               | 3.15                         | 7.07E-04 |                                                        |                           |
|                  |            |                  | Pfdn5 / CG7048    | FBgn0038976 | -0.714                                | 0.61               | 1.59                         | 2.58E-02 |                                                        |                           |
|                  |            |                  | Arc2              | FBgn0033928 | -0.668                                | 0.63               | 1.75                         | 1.79E-02 |                                                        |                           |
|                  |            |                  | Pdfr              | FBgn0260753 | -0.665                                | 0.63               | 1.59                         | 2.58E-02 |                                                        |                           |
|                  |            |                  | CG3448            | FBgn0035996 | -0.640                                | 0.64               | 1.53                         | 2.94E-02 |                                                        |                           |
|                  |            |                  | CG31777           | FBgn0051777 | -0.634                                | 0.64               | 1.59                         | 2.55E-02 |                                                        |                           |
|                  |            |                  | CG18088           | FBgn0032082 | -0.627                                | 0.65               | 2.84                         | 1.44E-03 |                                                        |                           |
|                  |            |                  | unc-13            | FBgn0025726 | -0.582                                | 0.67               | 2.14                         | 7.22E-03 |                                                        |                           |
|                  |            |                  | Rab23             | FBgn0037364 | -0.574                                | 0.67               | 1.55                         | 2.84E-02 |                                                        |                           |
|                  |            |                  | GstE2             | FBgn0063498 | -0.568                                | 0.67               | 1.64                         | 2.30E-02 |                                                        |                           |
|                  |            |                  | CG12868           | FBgn0033945 | -0.534                                | 0.69               | 3.06                         | 8.76E-04 |                                                        |                           |
|                  |            |                  | ver               | FBgn0262524 | -0.471                                | 0.72               | 3.71                         | 1.94E-04 |                                                        |                           |
|                  |            |                  | Bin1              | FBgn0024491 | -0.469                                | 0.72               | 3.60                         | 2.48E-04 |                                                        |                           |
|                  |            |                  | Tsp42Ee           | FBgn0029506 | -0.445                                | 0.73               | 1.53                         | 2.95E-02 |                                                        |                           |
|                  |            |                  | Marc / CG1665     | FBgn0033451 | -0.415                                | 0.75               | 1.35                         | 4.46E-02 |                                                        |                           |
|                  |            |                  | IscU              | FBgn0037637 | -0.407                                | 0.75               | 4.14                         | 7.28E-05 |                                                        |                           |
|                  |            |                  | Lst8              | FBgn0264691 | -0.397                                | 0.76               | 1.58                         | 2.64E-02 |                                                        |                           |
|                  |            |                  | DNAIig4 / Lig4    | FBgn0030506 | -0.344                                | 0.79               | 1.58                         | 2.64E-02 |                                                        |                           |
|                  |            |                  | CG33169           | FBgn0053169 | -0.342                                | 0.79               | 1.35                         | 4.46E-02 |                                                        |                           |
|                  |            |                  | CG11436           | FBgn0029713 | -0.319                                | 0.80               | 1.59                         | 2.55E-02 |                                                        |                           |
|                  |            |                  | CG4239            | FBgn0030745 | -0.313                                | 0.80               | 1.79                         | 1.64E-02 |                                                        |                           |
|                  |            |                  | CG6171            | FBgn0026737 | -0.300                                | 0.81               | 1.35                         | 4.47E-02 |                                                        |                           |
|                  |            |                  | muc               | FBgn0283658 | 0.218                                 | 1.16               | 1.64                         | 2.30E-02 |                                                        |                           |
|                  |            |                  | TBCB              | FBgn0034451 | 0.282                                 | 1.22               | 1.55                         | 2.83E-02 |                                                        |                           |
|                  |            |                  | CG1354            | FBgn0030151 | 0.293                                 | 1.23               | 2.51                         | 3.09E-03 |                                                        |                           |
|                  |            |                  | CysRS / Aats-cys  | FBgn0027091 | 0.363                                 | 1.29               | 1.72                         | 1.92E-02 |                                                        |                           |
|                  |            |                  | eIF3d1 / eIF-3p66 | FBgn0040227 | 0.371                                 | 1.29               | 1.40                         | 4.02E-02 |                                                        |                           |
|                  |            |                  | CG17746           | FBgn0035425 | 0.376                                 | 1.30               | 1.56                         | 2.74E-02 |                                                        |                           |
|                  |            |                  | TyrRS /Aats-tyr   | FBgn0027080 | 0.389                                 | 1.31               | 1.75                         | 1.77E-02 |                                                        |                           |
|                  |            |                  | bbc               | FBgn0033844 | 0.390                                 | 1.31               | 1.64                         | 2.30E-02 |                                                        |                           |
|                  |            |                  | SCaMC             | FBgn0052103 | 0.431                                 | 1.35               | 1.61                         | 2.46E-02 |                                                        |                           |
|                  |            |                  | ThrRS / Aats-thr  | FBgn0027081 | 0.483                                 | 1.40               | 1.36                         | 4.37E-02 |                                                        |                           |
|                  |            |                  | AsnS              | FBgn0270926 | 0.484                                 | 1.40               | 1.35                         | 4.48E-02 |                                                        |                           |
|                  |            |                  | CG3408            | FBgn0036008 | 0.520                                 | 1.43               | 1.36                         | 4.34E-02 |                                                        |                           |
|                  |            |                  | IP3K1             | FBgn0032147 | 0.541                                 | 1.45               | 3.29                         | 5.11E-04 |                                                        |                           |
|                  |            |                  | CG32280           | FBgn0052280 | 0.595                                 | 1.51               | 1.64                         | 2.30E-02 |                                                        |                           |
|                  |            |                  | CG30069           | FBgn0050069 | 0.605                                 | 1.52               | 2.14                         | 7.22E-03 |                                                        |                           |
|                  |            |                  | CG10737           | FBgn0034420 | 0.612                                 | 1.53               | 2.37                         | 4.23E-03 |                                                        |                           |
|                  |            |                  | ATPsyndelta       | FBgn0028342 | 0.614                                 | 1.53               | 1.48                         | 3.35E-02 |                                                        |                           |

| hemocyte-related | cell cycle | lipid metabolism | gene symbol           | FlyBase ID  | log <sub>2</sub> (FC dsUsh-B/dsEGFP) | FC dsUsh-B/dsEGFP | -log <sub>10</sub> (p-value) | p-value  | FlyBase GO_Biological Function / additional references | expression pattern (BDGP) |
|------------------|------------|------------------|-----------------------|-------------|--------------------------------------|-------------------|------------------------------|----------|--------------------------------------------------------|---------------------------|
|                  |            |                  | <b>CG8563</b>         | FBgn0035777 | 0.665                                | 1.59              | 1.75                         | 1.77E-02 |                                                        |                           |
|                  |            |                  | <b>CG42458</b>        | FBgn0259935 | 0.675                                | 1.60              | 1.36                         | 4.34E-02 |                                                        |                           |
|                  |            |                  | <b>CG4872</b>         | FBgn0030799 | 0.691                                | 1.61              | 2.26                         | 5.55E-03 |                                                        |                           |
|                  |            |                  | <b>AdamTS-A</b>       | FBgn0286071 | 0.700                                | 1.62              | 1.37                         | 4.29E-02 |                                                        |                           |
|                  |            |                  | <b>nkd</b>            | FBgn0002945 | 0.727                                | 1.66              | 1.53                         | 2.96E-02 |                                                        |                           |
|                  |            |                  | <b>lncRNA:CR44138</b> | FBgn0264987 | 0.728                                | 1.66              | 1.53                         | 2.94E-02 |                                                        |                           |
|                  |            |                  | <b>CG3655</b>         | FBgn0040397 | 0.729                                | 1.66              | 1.55                         | 2.83E-02 |                                                        |                           |
|                  |            |                  | <b>path</b>           | FBgn0036007 | 0.731                                | 1.66              | 1.58                         | 2.62E-02 |                                                        |                           |
|                  |            |                  | <b>CG42324</b>        | FBgn0259224 | 0.738                                | 1.67              | 1.58                         | 2.64E-02 |                                                        |                           |
|                  |            |                  | <b>CG1077</b>         | FBgn0037405 | 0.748                                | 1.68              | 1.63                         | 2.37E-02 |                                                        |                           |
|                  |            |                  | <b>CG4611</b>         | FBgn0035591 | 0.774                                | 1.71              | 3.37                         | 4.22E-04 |                                                        |                           |
|                  |            |                  | <b>CG8312</b>         | FBgn0037720 | 0.796                                | 1.74              | 2.13                         | 7.33E-03 |                                                        |                           |
|                  |            |                  | <b>RpL18</b>          | FBgn0035753 | 0.860                                | 1.82              | 3.46                         | 3.44E-04 |                                                        |                           |
|                  |            |                  | <b>CG12075</b>        | FBgn0030065 | 0.869                                | 1.83              | 2.74                         | 1.84E-03 |                                                        |                           |
|                  |            |                  | <b>CG14879</b>        | FBgn0038419 | 0.908                                | 1.88              | 2.72                         | 1.92E-03 |                                                        |                           |
|                  |            |                  | <b>axo</b>            | FBgn0262870 | 0.978                                | 1.97              | 3.37                         | 4.22E-04 |                                                        |                           |
|                  |            |                  | <b>CG3246</b>         | FBgn0031538 | 0.983                                | 1.98              | 3.37                         | 4.22E-04 |                                                        |                           |
|                  |            |                  | <b>comm2</b>          | FBgn0041160 | 1.841                                | 3.58              | 17.62                        | 2.42E-18 |                                                        |                           |
