# Supplementary material for: Ush regulates hemocyte-specific gene expression, fatty acid metabolism and cell cycle progression and cooperates with dNuRD to orchestrate hematopoiesis
Source: PubMed Central journal article supplement (PMC7891773; doi:10.1371/journal.pgen.1009318), 2021-02-18
Supplement: pgen.1009318.s011.pdf [file pgen.1009318.s011.pdf]

| NuRD complex subunit | Genotype crossed to<br><i>y w; ush<sup>VX22</sup>, MSN-C/CyO y+ or y w; MSN-C</i>                          | genetic background<br>(selected based on <i>MSN-C</i> , <i>y</i> and/or <i>Tb</i> phenotypic markers)                                                                                   | number of <i>MSN</i> larvae tested | number of <i>MSN</i> larvae with $\geq 10x$ <i>Im</i> * | % larvae w/ $\geq 10x$ <i>Im</i> * | Estimated penetrance |
|----------------------|------------------------------------------------------------------------------------------------------------|-----------------------------------------------------------------------------------------------------------------------------------------------------------------------------------------|------------------------------------|---------------------------------------------------------|------------------------------------|----------------------|
|                      | <i>w<sup>1118</sup></i>                                                                                    | <i>y w; ush<sup>VX22</sup>, MSN-C/+</i>                                                                                                                                                 | 32                                 | 3                                                       | 9.4                                | 9.4                  |
|                      | <i>y; ush<sup>r24</sup>/CyO y+ #</i>                                                                       | <i>y w; ush<sup>VX22</sup>, MSN-C/ush<sup>r24</sup></i>                                                                                                                                 | 14                                 | 14                                                      | 100.0                              | 100.0                |
| dMTA-1like           | <i>w<sup>1118</sup>; MTA1-like<sup>d09140</sup>/TM6B, Tb<sup>1</sup> +</i>                                 | <i>w<sup>1118</sup>/yw; MSN-C/+; MTA1-like<sup>d09140</sup>/+</i>                                                                                                                       | 28                                 | 2                                                       | 7.1                                | 7.1                  |
|                      |                                                                                                            | <i>w<sup>1118</sup>/yw; ush<sup>VX22</sup>, MSN-C/+; MTA1-like<sup>d09140</sup>/+</i>                                                                                                   | 48                                 | 25                                                      | 52.1                               | 52.1                 |
|                      | <i>y<sup>1</sup> w*; MTA1-like<sup>Mi01790</sup> **</i>                                                    | <i>y w; MSN-C/+; MTA1-like<sup>Mi01790</sup>/+</i>                                                                                                                                      | 31                                 | 1                                                       | 3.2                                | 3.2                  |
|                      |                                                                                                            | <i>y w; ush<sup>VX22</sup>, MSN-C/+; MTA1-like<sup>Mi01790</sup>/+</i>                                                                                                                  | 38                                 | 28                                                      | 73.7                               | 73.7                 |
| dp66                 | <i>w<sup>1118</sup>; simj<sup>BG00403</sup>/TM6B, Tb<sup>1</sup> +</i>                                     | <i>w<sup>1118</sup>/yw; MSN-C/+; simj<sup>BG00403</sup>/+</i>                                                                                                                           | 26                                 | 0                                                       | 0.0                                | 0.0                  |
|                      |                                                                                                            | <i>w<sup>1118</sup>/y w; ush<sup>VX22</sup>, MSN-C/+; simj<sup>BG00403</sup>/+</i>                                                                                                      | 39                                 | 17                                                      | 43.6                               | 43.6                 |
|                      | <i>simj<sup>01814</sup> ry<sup>506</sup> **</i>                                                            | <i>y w/+; MSN-C/+; simj<sup>01814</sup> ry<sup>506</sup>/+</i>                                                                                                                          | 40                                 | 2                                                       | 5.0                                | 5.0                  |
|                      |                                                                                                            | <i>y w/+; ush<sup>VX22</sup>, MSN-C/+; simj<sup>01814</sup> ry<sup>506</sup>/+</i>                                                                                                      | 61                                 | 31                                                      | 50.8                               | 50.8                 |
| dRpd3                | <i>y<sup>1</sup> w*; HDAC1<sup>12-37</sup>/TM6B, Tb<sup>1</sup> *</i>                                      | <i>y w; MSN-C/+; HDAC1<sup>12-37</sup> /+</i>                                                                                                                                           | 30                                 | 15                                                      | 50.0                               | 50.0                 |
|                      |                                                                                                            | <i>y w; ush<sup>VX22</sup>, MSN-C/+; HDAC1<sup>12-37</sup> /+</i>                                                                                                                       | 42                                 | 35                                                      | 83.3                               | 83.3                 |
|                      | <i>HDAC1<sup>04556</sup> ry<sup>506</sup>/TM3, ry<sup>RK</sup> Sb<sup>1</sup> Ser<sup>1</sup> ++</i>       | <i>y w/+; MSN-C/+; HDAC1<sup>04556</sup> ry<sup>506</sup> /+ AND<br/>y w/+; MSN-C/+; TM3, ry<sup>RK</sup> Sb<sup>1</sup> Ser<sup>1</sup> /+</i>                                         | 27                                 | 2                                                       | 7.4                                | 14.8                 |
|                      |                                                                                                            | <i>y w/+; ush<sup>VX22</sup>, MSN-C/+; HDAC1<sup>04556</sup> ry<sup>506</sup> /+ AND<br/>y w/+; ush<sup>VX22</sup>, MSN-C/+; TM3, ry<sup>RK</sup> Sb<sup>1</sup> Ser<sup>1</sup> /+</i> | 53                                 | 17                                                      | 32.1                               | 64.2                 |
| dMi-2                | <i>Mi-2<sup>4</sup> red<sup>1</sup> e<sup>4</sup>/TM6B, Sb<sup>1</sup> Tb<sup>1</sup> ca<sup>1</sup> +</i> | <i>y w/+; MSN-C/+; Mi-2<sup>4</sup> red<sup>1</sup> e<sup>4</sup>/+</i>                                                                                                                 | NT                                 | NT                                                      | NT                                 | NT                   |
|                      |                                                                                                            | <i>y w/+; ush<sup>VX22</sup>, MSN-C/+; Mi-2<sup>4</sup> red<sup>1</sup> e<sup>4</sup>/+</i>                                                                                             | 45                                 | 16                                                      | 35.6                               | 35.6                 |
|                      | <i>y<sup>1</sup> w<sup>1118</sup>; Mi-2<sup>L1243</sup>/TM3, Ser<sup>1</sup> ++</i>                        | <i>y w; MSN-C/+; Mi-2<sup>L1243</sup>/+ AND<br/>y w; MSN-C/+; TM3, Ser<sup>1</sup>/+</i>                                                                                                | NT                                 | NT                                                      | NT                                 | NT                   |
|                      |                                                                                                            | <i>y w; ush<sup>VX22</sup>, MSN-C/+; Mi-2<sup>L1243</sup>/+ AND<br/>y w; ush<sup>VX22</sup>, MSN-C/+; TM3, Ser<sup>1</sup>/+</i>                                                        | 51                                 | 8                                                       | 15.7                               | 31.4                 |

\*Estimated number of lamellocytes (*Im*)

#To identify animals with the *ush<sup>r24</sup>/ush<sup>VX22</sup>, MSN* genotype, larvae with yellow mouth hooks were selected.

+The *Tb* balancer chromosome is easily distinguished from the *MTA-1* like chromosome.

\*\*Homozygous viable

++Heterozygous, which assumes only 50% of the animals that carry the *ush; MSN-mCherry* chromosome are double heterozygotes and thus, the estimated penetrance may be twice the value of the % larvae with increased lamellocyte differentiation.

NT: not tested
