# Supplementary material for: Ush regulates hemocyte-specific gene expression, fatty acid metabolism and cell cycle progression and cooperates with dNuRD to orchestrate hematopoiesis
Source: PubMed Central journal article supplement (PMC7891773; doi:10.1371/journal.pgen.1009318), 2021-02-18
Supplement: pgen.1009318.s012.pdf [file pgen.1009318.s012.pdf]

| name             | sequence                                                                                                 | application                                              | method                      |
|------------------|----------------------------------------------------------------------------------------------------------|----------------------------------------------------------|-----------------------------|
| sgRNA_scaffold   | GTTTAAGAGCTATGCTGGAAACAGCATAGCAAGTTTAAATAAAGGCTAGTCCGTTATCA<br>ACTTGAAAAAGTGGCACCGAGTCGGTGC              | general sgRNA template synthesis                         | endogenous tagging          |
| U6-promotor_s    | GCTCACCTGTGATTGCTCCTAC                                                                                   | general sgRNA template synthesis                         | endogenous tagging          |
| sgRNA_as         | gcttattctcAAAAAGCACCGACTCGGTGCCACT                                                                       | general sgRNA template synthesis                         | endogenous tagging          |
| lig4_RNAi_s      | taatacgactcactatagggCCCAATGATCCAAAGTGTTTTTGCA                                                            | generation of dsRNA against lig4                         | endogenous tagging          |
| lig4_RNAi_as     | taatacgactcactatagGGAAGTAGGATGCCTTCGCGA                                                                  | generation of dsRNA against lig4                         | endogenous tagging          |
| mus308_RNAi_s    | taatacgactcactatagggGCTGGGACTCCACCGGAAAG                                                                 | generation of dsRNA against mus308                       | endogenous tagging          |
| mus308_RNAi_as   | taatacgactcactatagggTACCGTCGCCGTCCAGTAATG                                                                | generation of dsRNA against mus308                       | endogenous tagging          |
| CRISPR_Mi2_Ct    | cctatthttcaatthtaacgtcgTCGAATAATTCGGCGTCTgtthtaagagctatgctg                                              | sgRNA synthesis dMi-2 C-term                             | endogenous tagging of dMi-2 |
| Mi2_Ctag_s       | TTTGCCAACCTTTCGGCCACAGTTCTCGGTGCCCGCCAGCTATCGAATAATTCGGCG<br>TCggatcttccgatggctcgag                      | generation of homology donors for dMi-2                  | endogenous tagging of dMi-2 |
| Mi2_Ctag_as      | TTGAGTAAAGTATATTTGCATGGAATACGAATGCTCTTAACATAGATATTGAGGAGAT<br>GCgaagttcctattctctagaaagtataggaacttccatatg | generation of homology donors for dMi-2                  | endogenous tagging of dMi-2 |
| Mi2_PCR_C_us_s   | tgccagcattcagcagcggaccg                                                                                  | genotyping of cell lines containing tagged dMi-2 alleles | endogenous tagging of dMi-2 |
| Mi2_PCR_C_ds_as  | gtgggtgtgcaggtgtgttaccgtg                                                                                | genotyping of cell lines containing tagged dMi-2 alleles | endogenous tagging of dMi-2 |
| CRISPR_ush_Ct    | cctatthttcaatthtaacgtcgCATTTGAGAAAGCCAGCTGgtthtaagagctatgctg                                             | sgRNA synthesis Ush C-term                               | endogenous tagging of Ush   |
| ush_Ctag_s       | GGCCTGGTCGGCGGACACGGCCAGCAGAAGAACAAGGAAAACCTGCAGGAGGCGGCCA<br>TTggatcttccgatggctcgag                     | generation of homology donors for Ush                    | endogenous tagging of Ush   |
| ush_Ctag_as      | GAAGCACGTGTAATACCACTCAAGCTGCTTGCCTGCGCTCCCACCGCAGCTGGCTT<br>TCgaagttcctattctctagaaagtataggaacttccatatg   | generation of homology donors for Ush                    | endogenous tagging of Ush   |
| ush_PCR_us_s     | AGTCCGAATCACCTGGGCGGAGG                                                                                  | genotyping of cell lines containing tagged Ush alleles   | endogenous tagging of Ush   |
| ush_PCR_ds_as    | GAGGCTAGGATTTCGATTAGTTTCGA                                                                               | genotyping of cell lines containing tagged Ush alleles   | endogenous tagging of Ush   |
| EGFP-T7-RNAi-fw  | gaattaatacgactcactataggggaGAGCTGGACGGCGACGTAA                                                            | generation of dsRNA against EGFP                         | RNAi                        |
| EGFP-T7-RNAi-rv  | gaattaatacgactcactatagggagACTTGACAGCTCGTCCATG                                                            | generation of dsRNA against EGFP                         | RNAi                        |
| Luc-T7-RNAi-fw   | taatacgactcactatagggCTGGTTCCTGGAACAATTGC                                                                 | generation of dsRNA against Luciferase                   | RNAi                        |
| Luc-T7-RNAi-rv   | taatacgactcactatagggTGACGAACGTGTACATCGA                                                                  | generation of dsRNA against Luciferase                   | RNAi                        |
| Ush-T7-RNAi-1-fw | taatacgactcactatagggCAGCCCAAGCACTCCG                                                                     | generation of dsRNA against Ush (#1)                     | RNAi                        |
| Ush-T7-RNAi-1-rv | taatacgactcactatagggGCTGTAGGAGCACTGG                                                                     | generation of dsRNA against Ush (#1)                     | RNAi                        |
| Ush-T7-RNAi-2-fw | taatacgactcactatagggACACTTCCCTGGACAACCTG                                                                 | generation of dsRNA against Ush (#2)                     | RNAi                        |
| Ush-T7-RNAi-2-rv | taatacgactcactatagggAGTTGTGGTAGATGCCCTG                                                                  | generation of dsRNA against Ush (#2)                     | RNAi                        |
| Mi-2-T7-RNAi-fw  | taatacgactcactatagggTTAACTCGCTGACCAAGGCT                                                                 | generation of dsRNA against dMi-2                        | RNAi                        |
| Mi-2-T7-RNAi-rv  | taatacgactcactatagggATATCGTTGTGGGATTCGA                                                                  | generation of dsRNA against dMi-2                        | RNAi                        |
| Ush-B-T7-RNAi-fw | taatacgactcactatagggGCTTCGAACGGACGTCTTTA                                                                 | generation of dsRNA against Ush-B                        | RNAi                        |
| Ush-B-T7-RNAi-rv | taatacgactcactatagggGGGCAATCAATGCGATTACT                                                                 | generation of dsRNA against Ush-B                        | RNAi                        |
| MTA-T7-RNAi-fw   | taatacgactcactatagggCAGAACGCGAGACAACAAAA                                                                 | generation of dsRNA against dMTA1-like                   | RNAi                        |
| MTA-T7-RNAi-rv   | taatacgactcactatagggTGGAACCTTAGAGCGCGATT                                                                 | generation of dsRNA against dMTA1-like                   | RNAi                        |

| name          | sequence                    | application                                     | method  |
|---------------|-----------------------------|-------------------------------------------------|---------|
| rp49-RT-fw    | TGTCCTTCCAGCTTCAAGATGACCATC | amplification of rp49 cDNA fragment in qPCR     | RT-qPCR |
| rp49-RT-rv    | CTTGGGCTTGCGCCATTTGTG       | amplification of rp49 cDNA fragment in qPCR     | RT-qPCR |
| CG16762-RT-fw | GGTATCGATGCCGACTTCC         | amplification of CG16762 cDNA fragment in qPCR  | RT-qPCR |
| CG16762-RT-rv | TGGAGCCCACATTGGCA           | amplification of CG16762 cDNA fragment in qPCR  | RT-qPCR |
| lz-RT-fw      | CGAATTGGTGCACGACGAG         | amplification of Lozenge cDNA fragment in qPCR  | RT-qPCR |
| lz-RT-rv      | CCCGGATGGTGACATAGGTG        | amplification of Lozenge cDNA fragment in qPCR  | RT-qPCR |
| pirk-RT-fw    | AGCGGCGATGCCAAGAAAAG        | amplification of pirk cDNA fragment in qPCR     | RT-qPCR |
| pirk-RT-rv    | GCTCCGTGCCGTATCGTTAG        | amplification of pirk cDNA fragment in qPCR     | RT-qPCR |
| GILT3-RT-fw   | CAAGGCGGGGTTCTACAACA        | amplification of GILT3 cDNA fragment in qPCR    | RT-qPCR |
| GILT3-RT-rv   | TCCGAATGTCCAGGGTCTCAA       | amplification of GILT3 cDNA fragment in qPCR    | RT-qPCR |
| atilla-RT-fw  | AAACAAGTGATTTTCGTGCTCCT     | amplification of atilla cDNA fragment in qPCR   | RT-qPCR |
| atilla-RT-rv  | CGCGGATGTTAGAGGCAGA         | amplification of atilla cDNA fragment in qPCR   | RT-qPCR |
| AurB-RT-fw    | TACGGACAGCCATACGATTGGAG     | amplification of Aurora B cDNA fragment in qPCR | RT-qPCR |
| AurB-RT-rv    | ACCAGATAGTGCAGTGGCG         | amplification of Aurora B cDNA fragment in qPCR | RT-qPCR |
| CHES-1-RT-fw  | CAGTGAGGAGAATCACAACATCAC    | amplification of CHES-1 cDNA fragment in qPCR   | RT-qPCR |
| CHES-1-RT-rv  | CTGAGCCGCACTCCACAATC        | amplification of CHES-1 cDNA fragment in qPCR   | RT-qPCR |
| Cdk1-RT-fw    | CCGCGATCAGAGAAATTTTCGTTG    | amplification of Cdk1 cDNA fragment in qPCR     | RT-qPCR |
| Cdk1-RT-rv    | GAGGTCCATCGATAGGAATTCAAAG   | amplification of Cdk1 cDNA fragment in qPCR     | RT-qPCR |
| polo-RT-fw    | TCTGCACGACGCCATTACCG        | amplification of polo cDNA fragment in qPCR     | RT-qPCR |
| polo-RT-rv    | AGAATTCGCGGCTTTCCGTT        | amplification of polo cDNA fragment in qPCR     | RT-qPCR |
| CycB-RT-fw    | CCCCTAAAGTTACAGTCAAGTCC     | amplification of Cyclin B cDNA fragment in qPCR | RT-qPCR |
| CycB-RT-rv    | CTGAAACTCCCATCACGGGT        | amplification of Cyclin B cDNA fragment in qPCR | RT-qPCR |
| Mcad-RT-fw    | GTTTGGATCATTTCGCTGGCA       | amplification of Mcad cDNA fragment in qPCR     | RT-qPCR |
| Mcad-RT-rv    | CAGCAAGCTTGTTGAGGAAC        | amplification of Mcad cDNA fragment in qPCR     | RT-qPCR |
| Echs1-RT-fw   | ATCGGCACCCACTCCAATCT        | amplification of Echs1 cDNA fragment in qPCR    | RT-qPCR |
| Echs1-RT-rv   | CTTGCGATCGGCCGTGGAG         | amplification of Echs1 cDNA fragment in qPCR    | RT-qPCR |
| ACC-RT-fw     | ACAAGATTGGCTTCCCCGTAATG     | amplification of ACC cDNA fragment in qPCR      | RT-qPCR |
| ACC-RT-rv     | GCTTGAACCTGGCGGAACAG        | amplification of ACC cDNA fragment in qPCR      | RT-qPCR |
| CROT-RT-fw    | TGCATAAAGAAATTGCTCCAC       | amplification of CROT cDNA fragment in qPCR     | RT-qPCR |
| CROT-RT-rv    | TTGTTGGATGACGCCCTCAG        | amplification of CROT cDNA fragment in qPCR     | RT-qPCR |
| fa2h-RT-fw    | GATAGTATGGAGCACCTAGTGGAC    | amplification of fa2h cDNA fragment in qPCR     | RT-qPCR |
| fa2h-RT-rv    | CCAAGGGTCAAAGAGACGCA        | amplification of fa2h cDNA fragment in qPCR     | RT-qPCR |
